# Supplementary material for: The Impact of State Paid Sick Leave Policies on Longitudinal Weekday Workplace Mobility During the COVID-19 Pandemic
Source: bioRxiv or medRxiv preprint supplement (doi:10.1101/2022.01.16.22269377), 2022-01-17
Supplement: Supplementary file [file media-1.pdf]

## Supplementary Information

### Supplementary Table 1. Bivariate covariate analysis

Note that each row represents an independent model.

| Bivariate Comparisons Model                                              |                      |                      |
|--------------------------------------------------------------------------|----------------------|----------------------|
| Coefficient                                                              | $\beta$ (95% CI)     | P-Value <sup>a</sup> |
| Health Metrics                                                           |                      |                      |
| Cumulative Cases per 100                                                 | -5.41 (-6.36, -4.45) | < .001               |
| New Cases per 100,000                                                    | -0.03 (-0.04, -0.03) | < .001               |
| New Deaths per 100,000                                                   | -0.43 (-0.51, -0.35) | < .001               |
| Travel Metrics                                                           |                      |                      |
| Travel to Transit Stations (% Change from Baseline)                      | 0.42 (0.40, 0.44)    | < .001               |
| Average Commute Time (Minutes)                                           | -1.04 (-1.22, -0.86) | < .001               |
| Average Commute Time on Public Transit (Minutes)                         | -0.39 (-0.58, -0.19) | < .001               |
| Commute via Car/Truck/Van Alone (%)                                      | 0.49 (0.35, 0.62)    | < .001               |
| Commute via Car/Truck/Van Carpool (%)                                    | 1.73 (0.63, 2.83)    | .003                 |
| Commute via Public Transportation Excluding Taxi (%)                     | -0.69 (-0.86, -0.53) | < .001               |
| Commute via Walking (%)                                                  | -1.35 (-2.09, -0.62) | < .001               |
| Commute via Other Means (%)                                              | -2.41 (-3.95, -0.87) | .003                 |
| Work at Home (%)                                                         | -1.40 (-2.83, 0.02)  | .057                 |
| Economic Metrics                                                         |                      |                      |
| Unemployment Rate (%)                                                    | -0.31 (-0.40, -0.20) | < .001               |
| 2017 Median Household Income (\$10,000 USD)                              | -2.47 (-3.64, -1.29) | < .001               |
| Labour Overall Index Score                                               | -0.15 (-0.20, -0.10) | < .001               |
| MIT Living Wage (%)                                                      | -1.87 (-2.42, -1.31) | < .001               |
| Annual State GDP for 2019 (Trillion USD)                                 | -3.65 (-6.40, -0.99) | .012                 |
| Poverty Rate (%)                                                         | 0.65 (0.08, 1.22)    | .028                 |
| Dominator Labor Sector (Reference: Trade, Transportation, and Utilities) |                      |                      |
| Education and Health Services                                            | -4.90 (-9.39, -0.42) | .044                 |
| Government                                                               | -2.13 (-6.19, 1.93)  | .326                 |
| Leisure and Hospitality                                                  | -3.55 (-11.4, 4.28)  | .395                 |
| Manufacturing                                                            | 0.90 (-9.99, 11.8)   | .876                 |
| Professional and Business Services                                       | -4.23 (-15.1, 6.67)  | .466                 |
| Demographic Metrics                                                      |                      |                      |
| Male (%)                                                                 | 2.83 (1.11, 4.55)    | .002                 |
| Black (%)                                                                | -0.13 (-0.28, 0.01)  | .081                 |
| Hispanic (%)                                                             | -0.17 (-0.32, -0.02) | .026                 |
| Asian (%)                                                                | -0.31 (-0.58, -0.05) | .024                 |
| 65 and Above (%)                                                         | 0.59 (-0.18, 1.37)   | .137                 |
| Politics and Policy                                                      |                      |                      |
| Paid Family Leave (Reference: No)                                        |                      |                      |
| Yes                                                                      | -10.6 (-14.8, -7.02) | < .001               |
| Required Pay Reporting (Reference: No)                                   |                      |                      |
| Yes                                                                      | -8.48 (-11.9, -5.07) | < .001               |
| Split Shift Pay 2019 (Reference: No)                                     |                      |                      |
| Yes                                                                      | -9.55 (-14.2, -4.94) | < .001               |
| Advanced Shift Notice 2019 (Reference: No)                               |                      |                      |
| Yes                                                                      | -9.72 (-15.0, -4.49) | < .001               |
| Job Protected Leave for Non-FMLA Workers 1 Year on Job (Reference: No)   |                      |                      |
| Pregnant Workers Only                                                    | -1.23 (-5.58, 3.11)  | .581                 |

|                                                                                                                                                                                                                                      |                      |        |
|--------------------------------------------------------------------------------------------------------------------------------------------------------------------------------------------------------------------------------------|----------------------|--------|
| Yes                                                                                                                                                                                                                                  | -6.84 (-10.1, -3.54) | < .001 |
| Job Protected Leave Longer than Federal FMLA (Reference: No)                                                                                                                                                                         |                      |        |
| Pregnant Workers Only                                                                                                                                                                                                                | -1.88 (-7.37, 3.63)  | .510   |
| Yes                                                                                                                                                                                                                                  | -7.77 (-13.3, -2.27) | .008   |
| Election Results Coding (Reference: Split)                                                                                                                                                                                           |                      |        |
| All Democrat                                                                                                                                                                                                                         | -6.63 (-11.5, -1.73) | .012   |
| Mostly Democrat                                                                                                                                                                                                                      | -4.52 (-9.93, 0.90)  | .117   |
| Mostly Republican                                                                                                                                                                                                                    | 0.07 (-7.09, 7.24)   | .985   |
| All Republican                                                                                                                                                                                                                       | 2.32 (-2.53, 7.16)   | .364   |
| Flexible Scheduling (Reference: No)                                                                                                                                                                                                  |                      |        |
| Yes                                                                                                                                                                                                                                  | -2.43 (-9.15, 4.29)  | .478   |
| Other                                                                                                                                                                                                                                |                      |        |
| State Population (1,000 Square Miles)                                                                                                                                                                                                | -2.04 (-2.85, -1.23) | < .001 |
| US State Land Area Square Miles (Million Square Miles)                                                                                                                                                                               | 16.3 (-1.88, 34.5)   | .083   |
| <sup>a</sup> Values derived from a mixed-effects model with a nested random effect for state and date. The outcome of interest is percent change in workplace mobility as determined from Google COVID-19 Community Mobility Reports |                      |        |
